# Supplementary material for: Pooled Saliva Specimens for SARS-CoV-2 Testing
Source: bioRxiv or medRxiv preprint supplement (doi:10.1101/2020.10.02.20204859), 2020-10-05
Supplement: Supplementary file [file media-1.pdf]

## Pooled Saliva Specimens for SARS-CoV-2 Testing

Barat et al. Supplementary Data

**Table S1: Summary of studies evaluating saliva as a specimen for SARS-CoV-2 testing**

| Reference, First Author | Characteristics                                                  | Collection Method                                                                                                        | Total Subjects    | Total Positive  | Sensitivity/ PPA (%)<br>SAL/ NP                               | Specificity / NPA (%)<br>SAL/NP | Testing Platform and Notes                                                                     |
|-------------------------|------------------------------------------------------------------|--------------------------------------------------------------------------------------------------------------------------|-------------------|-----------------|---------------------------------------------------------------|---------------------------------|------------------------------------------------------------------------------------------------|
| Jamal (1)               | All known positive                                               | Saliva<br><br>NP swab                                                                                                    | 91                | 72              | 72 SAL<br><br>89 NP                                           | -                               | Allplex™ 2019-nCoV Assay(100T) (Seegene Inc, Seoul, Korea)<br><br>Saliva + PBS                 |
| Nagura-Ikeda (2)        | 15 asymptomatic,<br><br>88 symptomatic<br><br>All known positive | Saliva<br><br>OP/NP for diagnosis                                                                                        | 103               | 103             | SAL<br><br>82 LDT<br><br>81 COBAS<br><br>71 RT-LAMP           | -                               | RT-qPCR LDT, cobas SARS-CoV-2 high-throughput system, RT-LAMP <sup>1</sup><br><br>Saliva + PBS |
| Wyllie (3)              | In-patient<br><br><br>Asymptomatic health-care workers           | Saliva upon waking prior to food/water intake<br><br><br>NP swab<br><br>Self- collected NP for asymptomatic <sup>2</sup> | 70<br><br><br>495 | 70<br><br><br>9 | 81 SAL<br>71 NP<br><br>Only 9 positive samples for comparison | -                               | CDC Assay<br><br>Viral load higher in saliva in patients                                       |

|                 |                                                                    |                                                  |     |     |                                                    |        |                                                                                                                     |
|-----------------|--------------------------------------------------------------------|--------------------------------------------------|-----|-----|----------------------------------------------------|--------|---------------------------------------------------------------------------------------------------------------------|
| Migueres (4)    | 17 Asymptomatic<br>27 Symptomatic<br>9 Hospitalized                | Saliva<br>NP swab                                | 123 | 44  | 88 SAL asymptomatic<br>95 SAL symptomatic<br>93 NP | -      | Panther Fusion™ module (Hologic)                                                                                    |
| Skolimowska (5) | Symptomatic healthcare workers<br>5 pediatric patients (<18 years) | Saliva<br>Combined OP/NP swab comparison         | 132 | 18  | 83 SAL                                             | 99 SAL | Roche, AusDiagnostics, ThermoFisher, Abbott<br><br>cobas® PCR medium                                                |
| Pasomsub (6)    | Symptomatic                                                        | Saliva<br>NP and throat swab                     | 200 | 19  | 84 SAL                                             | 99 SAL | SARS-CoV-2 Nucleic Acid Diagnostic Kit (Sansure, Changsha, China)<br><br>CFX96 Real-Time Detection System (Bio-Rad) |
| Williams (7)    | Screening clinic                                                   | Saliva<br>NP swab                                | 522 | 39  | 85 SAL                                             | 98 SAL | Coronavirus Typing (8-well) assay, AusDiagnostics)<br><br>Higher viral load in NP                                   |
| Zhu (8)         |                                                                    | Saliva<br>Respiratory tract sample (NP /OP swab) | 944 | 442 | 86 SAL                                             | 97 SAL |                                                                                                                     |

|                    |                                                                                                                           |                                      |     |     |                 |               |                                                                                                                      |
|--------------------|---------------------------------------------------------------------------------------------------------------------------|--------------------------------------|-----|-----|-----------------|---------------|----------------------------------------------------------------------------------------------------------------------|
| Landry (9)         | Symptomatic out-patient                                                                                                   | Saliva<br>NP swab                    | 124 | 35  | 86 SAL<br>94 NP | 98 SAL        | CDC Assay<br><br>1/3 saliva samples were thick                                                                       |
| Rao (10)           | Asymptomatic adult male, 8-10 day after tested positive<br>SAL from deep in throat upon waking prior to food/water intake | Saliva<br>NP swab                    | 217 | 160 | 93 SAL<br>53 NP | -             | One-step RT-PCR , Real-Q 2019 nCoV detection kit (Biosewoom, Inc, South Korea)<br><br>Higher viral load in saliva    |
| Hanson (11)        | Drive-thru test center                                                                                                    | Saliva<br>NP swab                    | 354 | 81  | 94 SAL          | 98 SAL        | Hologic Aptima SARS-CoV-2 transcription mediated amplification (TMA) assay<br><br>Saliva + Universal transport media |
| McCormick-Baw (12) | Emergency department                                                                                                      | Saliva<br>NP swab                    | 156 | 50  | 96 SAL          | 99 SAL        | Cepheid Xpert Xpress SARS27 CoV-2 PCR test                                                                           |
| Procop (13)        | Screening Center                                                                                                          | Elicited cough and saliva<br>NP swab | 216 | 38  | 100 SAL PPA     | 99 SAL<br>NPA | Aptima™ SARS-CoV-2 transcription mediated amplification assay (Panther™ System, Hologic)                             |

|              |                                                                |                                                                    |     |    |                                                                                      |   |                                                                                                                                                                   |
|--------------|----------------------------------------------------------------|--------------------------------------------------------------------|-----|----|--------------------------------------------------------------------------------------|---|-------------------------------------------------------------------------------------------------------------------------------------------------------------------|
| Azzi (14)    | Confirmed COVID-19 patients with severe or very severe disease | Saliva (drooling technique)<br>Or Endotracheal tube<br><br>NP swab | 25  | 25 | 100 SAL                                                                              | - | Abi Prism 7000 sequence detection system (Applied Biosystems)<br><br>QIAmp Viral RNA mini kit (Qiagen)<br><br>Luna Universal qPCR Master Mix (New England BioLab) |
| Iwasaki (15) | Symptomatic                                                    | Saliva<br><br>NP swab                                              | 76  | 9  | 97 Overall percent agreement                                                         | - | One-Step Real-Time RTPCR Master Mixes and tepOnePlus Real Time PCR System (Thermo Fisher Scientific)                                                              |
| Uwamino (16) | 32 hospitalized patients<br><br>115 symptomatic staff          | Saliva<br><br>NP swab                                              | 147 | 32 | 87 Overall concordance (SAL & NP)<br><br>96 overall concordance within first 10 days | - | LightCycler96 (Roche, Basel, Switzerland)<br><br>2019 Novel Coronavirus Detection Kit (Shimaszu, Kyoto, Japan)                                                    |
| Byrne (17)   | Emergency Department<br><br>In-patient symptomatic             | Saliva<br><br>Nasal and throat swab                                | 110 | 14 | 86 SAL                                                                               | - | QIAmp Viral RNA Mini Kit (QIAGEN)<br>Genesig Real-time Coronavirus COVID-19 PCR<br>Similar viral load                                                             |

<sup>1</sup>RT-LAMP : Reverse transcription-loop-mediated isothermal amplification

<sup>2</sup>All NP/OP healthcare collected except when noted

**Table S2: Study Participant Characteristics**

|                        | ED         | Drive- Through | Total      |
|------------------------|------------|----------------|------------|
| Number of Participants | 69         | 380            | 449        |
| Gender, Male N (%)     | 23 (33%)   | 159 (42%)      | 182 (41%)  |
| Age, Range (median)    | 21-88 (46) | 21-75 (42)     | 21-88 (42) |

Figure S1.

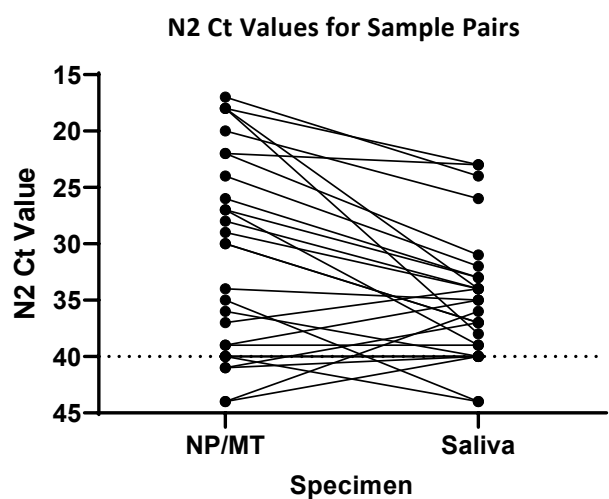

**Figure S1. N2 Cycle threshold (Ct) values for paired NP/MT and SAL samples (29 pairs).** Pairs are connected by a line. The N2 Ct was set to 40 for samples in which N2 was not detected, indicating a negative result for SARS-CoV-2 RNA. Horizontal dashed line is at Ct=40, the assay cut off. P-value <0.05 calculated by Wilcoxon matched- pair signed rank test.

Figure S2.

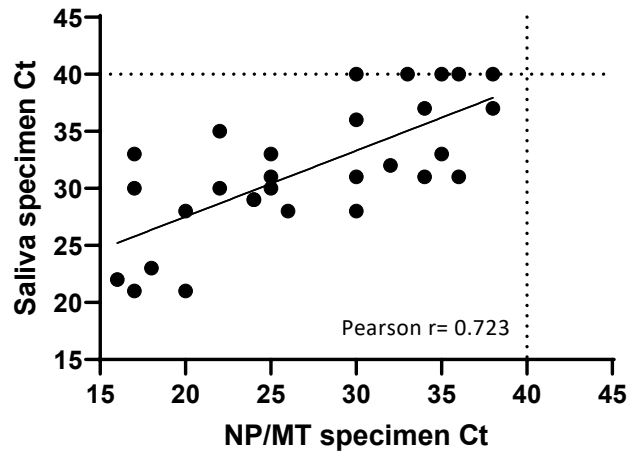

**Figure S2. Comparison of Cycle Threshold (Ct) values for N1 for NP versus SAL specimens (29 pairs).** Analysis demonstrates moderately good correlation between NP Ct values and Ct values for matched SAL samples. R and p values determined by Pearson correlation and graphically represented by linear regression. Dotted line indicates the limit of detection. P-value <0.001.

Figure S3 (A-B)

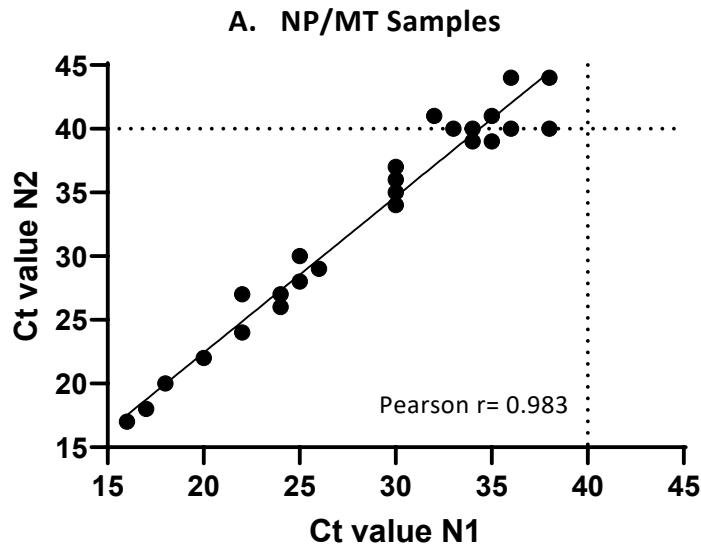

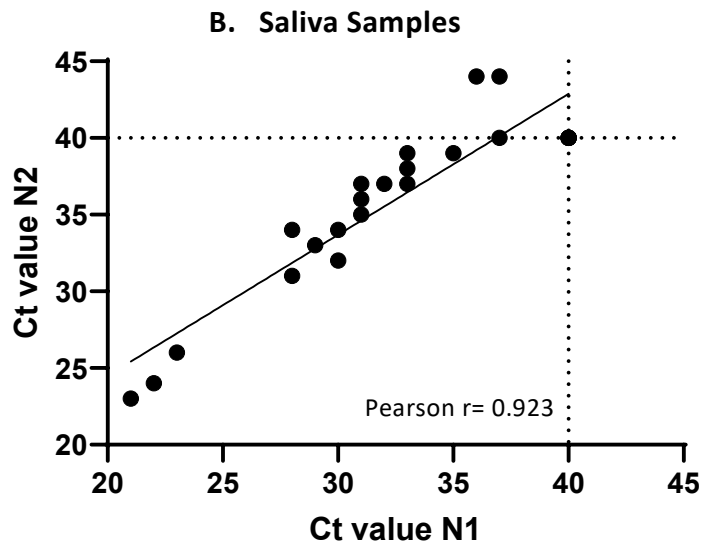

**Figure S3 (A-B). Concordance between SARS-CoV-2 detection in 29 samples of each type using CDC N1 primer and probe sets.** R and p values determined by Pearson correlation and graphically represented by linear regression. Dotted line indicates the limit of detection. P-value <0.001

Figure S4 (A-C)

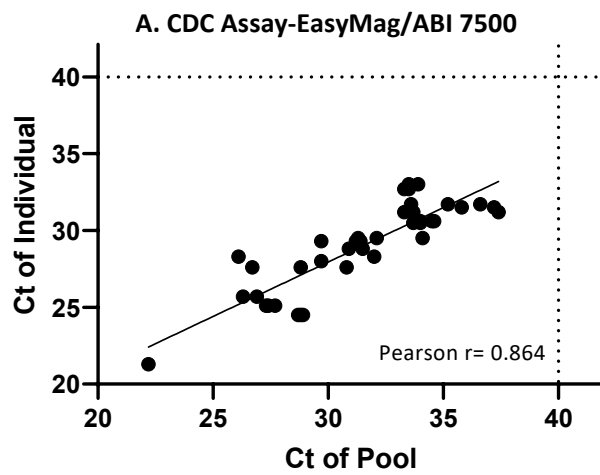

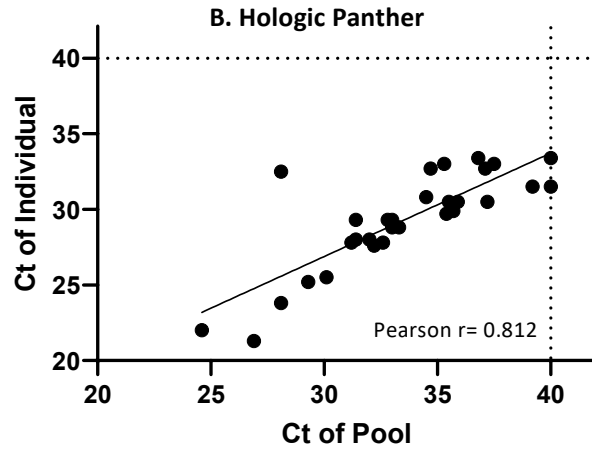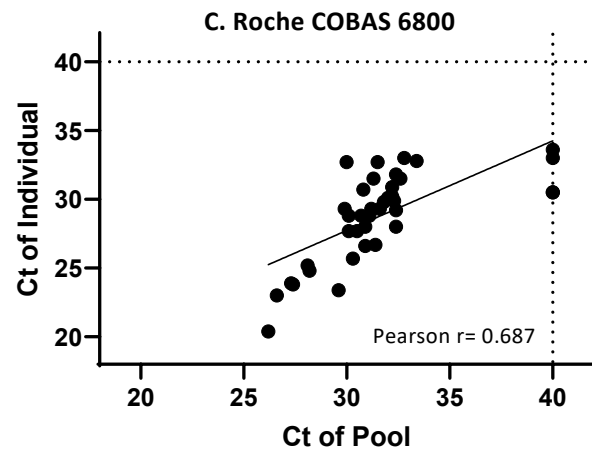

**Figure S4 (A-C).** Relationship between Ct values of individual and pooled SAL samples. R and p values determined by Pearson correlation and graphically represented by linear regression. Dotted line indicates the limit of detection. P-value<0.001



## References

1. Jamal AJ, Mozafarihashjin M, Coomes E, Powis J, Li AX, Paterson A, Anceva-Sami S, Barati S, Crowl G, Faheem A, Farooqi L, Khan S, Prost K, Poutanen S, Taylor M, Yip L, Zhong XZ, McGeer AJ, Mubareka S, Toronto Invasive Bacterial Diseases Network C-I. 2020. Sensitivity of nasopharyngeal swabs and saliva for the detection of severe acute respiratory syndrome coronavirus 2 (SARS-CoV-2). *Clin Infect Dis* doi:10.1093/cid/ciaa848.
2. Nagura-Ikeda M, Imai K, Tabata S, Miyoshi K, Murahara N, Mizuno T, Horiuchi M, Kato K, Imoto Y, Iwata M, Mimura S, Ito T, Tamura K, Kato Y. 2020. Clinical Evaluation of Self-Collected Saliva by Quantitative Reverse Transcription-PCR (RT-qPCR), Direct RT-qPCR, Reverse Transcription-Loop-Mediated Isothermal Amplification, and a Rapid Antigen Test To Diagnose COVID-19. *J Clin Microbiol* 58(9):e01438-20. doi: 10.1128/JCM.01438-20.
3. Wyllie AL, Fournier J, Casanovas-Massana A, Campbell M, Tokuyama M, Vijayakumar P, Warren JL, Geng B, Muenker MC, Moore AJ, Vogels CBF, Petrone ME, Ott IM, Lu P, Venkataraman A, Lu-Culligan A, Klein J, Earnest R, Simonov M, Datta R, Handoko R, Naushad N, Sewanan LR, Valdez J, White EB, Lapidus S, Kalinich CC, Jiang X, Kim DJ, Kudo E, Linehan M, Mao T, Moriyama M, Oh JE, Park A, Silva J, Song E, Takahashi T, Taura M, Weizman OE, Wong P, Yang Y, Bermejo S, Odio CD, Omer SB, Dela Cruz CS, Farhadian S, Martinello RA, Iwasaki A, Grubaugh ND, et al. 2020. Saliva or Nasopharyngeal Swab Specimens for Detection of SARS-CoV-2. *N Engl J Med* doi:10.1056/NEJMc2016359.
4. Miguères M, Mengelle C, Dimeglio C, Didier A, Alvarez M, Delobel P, Mansuy JM, Izopet J. 2020. Saliva sampling for diagnosing SARS-CoV-2 infections in symptomatic patients and asymptomatic carriers. *J Clin Virol* 130:104580 doi: 10.1016/j.jcv.2020.104580.
5. Skolimowska K, Rayment M, Jones R, Madona P, Moore LSP, Randell P. 2020. Non-invasive saliva specimens for the diagnosis of COVID-19: caution in mild outpatient cohorts with low prevalence. *Clin Microbiol Infect* doi:10.1016/j.cmi.2020.07.015.
6. Pasomsub E, Watcharananan SP, Boonyawat K, Janchompoo P, Wongtabtim G, Suksuwan W, Sungkanuparph S, Phuphuakrat A. 2020. Saliva sample as a non-invasive specimen for the diagnosis of coronavirus disease 2019: a cross-sectional study. *Clin Microbiol Infect* doi:10.1016/j.cmi.2020.05.001.
7. Williams E, Bond K, Zhang B, Putland M, Williamson DA. 2020. Saliva as a Noninvasive Specimen for Detection of SARS-CoV-2. *J Clin Microbiol* 58(8):e00776-20 doi: 10.1128/JCM.00776-20.
8. Zhu J, Guo J, Xu Y, Chen X. 2020. Viral dynamics of SARS-CoV-2 in saliva from infected patients. *J Infect* 81:e48-e50 doi: 10.1016/j.jinf.2020.06.059.
9. Landry ML, Criscuolo J, Peaper DR. 2020. Challenges in use of saliva for detection of SARS CoV-2 RNA in symptomatic outpatients. *J Clin Virol* 130:104567 doi: 10.1016/j.jcv.2020.104567.
10. Rao M, Rashid FA, Sabri F, Jamil NN, Zain R, Hashim R, Amran F, Kok HT, Samad MAA, Ahmad N. 2020. Comparing nasopharyngeal swab and early morning saliva for the identification of SARS-CoV-2. *Clin Infect Dis* doi:10.1093/cid/ciaa1156.
11. Hanson KE, Barker AP, Hillyard DR, Gilmore N, Barrett JW, Orlandi RR, Shakir SM. 2020. Self-Collected Anterior Nasal and Saliva Specimens versus Healthcare Worker-Collected

- Nasopharyngeal Swabs for the Molecular Detection of SARS-CoV-2. *J Clin Microbiol* doi:10.1128/JCM.01824-20.
12. McCormick-Baw C, Morgan K, Gaffney D, Cazares Y, Jaworski K, Byrd A, Molberg K, Cavuoti D. 2020. Saliva as an Alternate Specimen Source for Detection of SARS-CoV-2 in Symptomatic Patients Using Cepheid Xpert Xpress SARS-CoV-2. *J Clin Microbiol* 58(8):e01109-20. doi: 10.1128/JCM.01109-20.
  13. Procop GW, Shrestha NK, Vogel S, Van Sickle K, Harrington S, Rhoads DD, Rubin BP, Terpeluk P. 2020. A Direct Comparison of Enhanced Saliva to Nasopharyngeal Swab for the Detection of SARS-CoV-2 in Symptomatic Patients. *J Clin Microbiol* doi:10.1128/JCM.01946-20.
  14. Azzi L, Carcano G, Gianfagna F, Grossi P, Gasperina DD, Genoni A, Fasano M, Sessa F, Tettamanti L, Carinci F, Maurino V, Rossi A, Tagliabue A, Baj A. 2020. Saliva is a reliable tool to detect SARS-CoV-2. *J Infect* 81:e45-e50 doi: 10.1016/j.jinf.2020.04.005.
  15. Iwasaki S, Fujisawa S, Nakakubo S, Kamada K, Yamashita Y, Fukumoto T, Sato K, Oguri S, Taki K, Senjo H, Sugita J, Hayasaka K, Konno S, Nishida M, Teshima T. 2020. Comparison of SARS-CoV-2 detection in nasopharyngeal swab and saliva. *J Infect* 81:e145-e147 doi: 10.1016/j.jinf.2020.05.071.
  16. Uwamino Y, Nagata M, Aoki W, Fujimori Y, Nakagawa T, Yokota H, Sakai-Tagawa Y, Iwatsuki-Horimoto K, Shiraki T, Uchida S, Uno S, Kabata H, Ikemura S, Kamata H, Ishii M, Fukunaga K, Kawaoka Y, Hasegawa N, Murata M. 2020. Accuracy and stability of saliva as a sample for reverse transcription PCR detection of SARS-CoV-2. *J Clin Pathol* doi:10.1136/jclinpath-2020-206972.
  17. Byrne RL, Kay GA, Kontogianni K, Aljayyousi G, Brown L, Collins AM, Cuevas LE, Ferreira DM, Fraser AJ, Garrod G, Hill H, Hughes GL, Menzies S, Mitsi E, Owen SI, Patterson EI, Williams CT, Hyder-Wright A, Adams ER, Cubas-Atienzar AI. 2020. Saliva Alternative to Upper Respiratory Swabs for SARS-CoV-2 Diagnosis. *Emerg Infect Dis* 26(11) doi: 10.3201/eid2611.203283.
